# Supplementary material
Source: PubMed Central journal article supplement (PMC4947008)

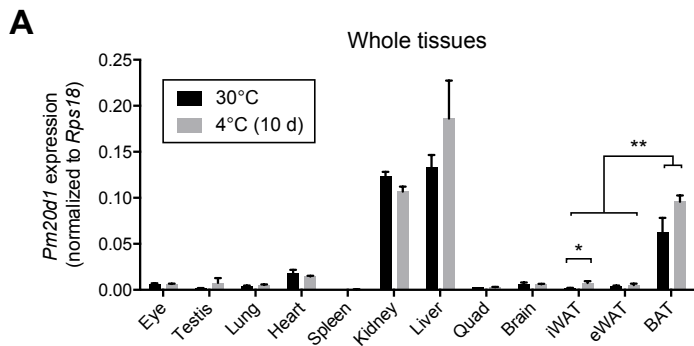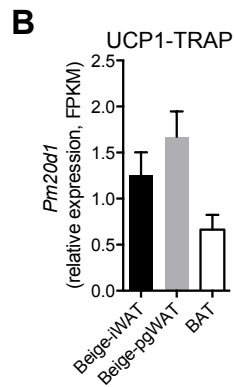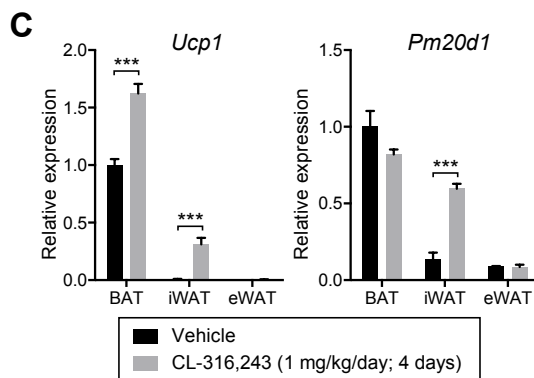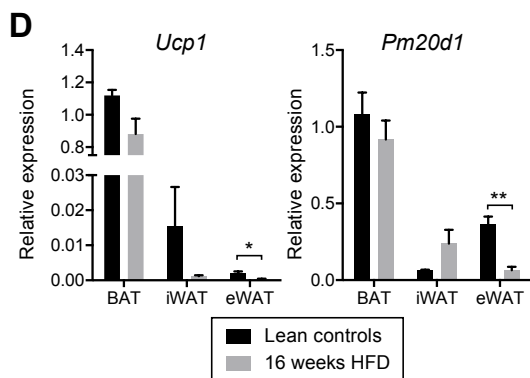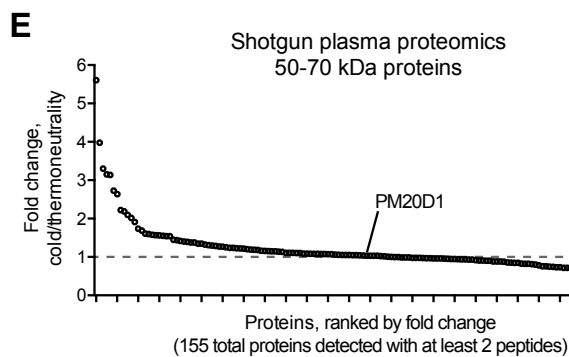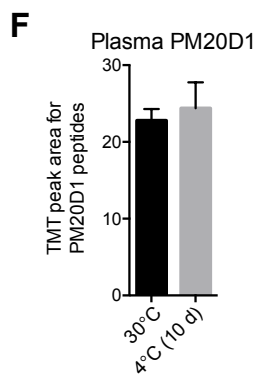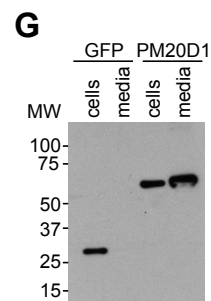

Figure S1

Supplement: NIHMS790543-supplement-1.pdf [file NIHMS790543-supplement-1.pdf]

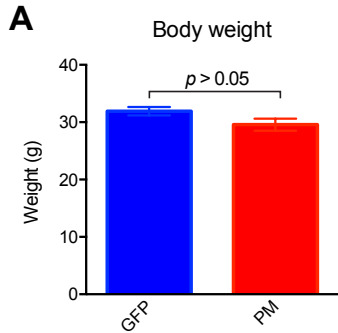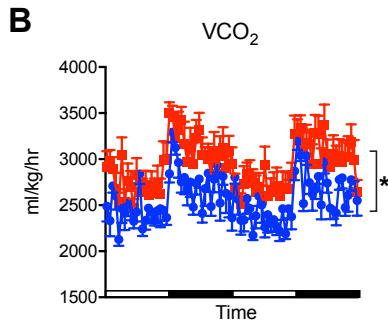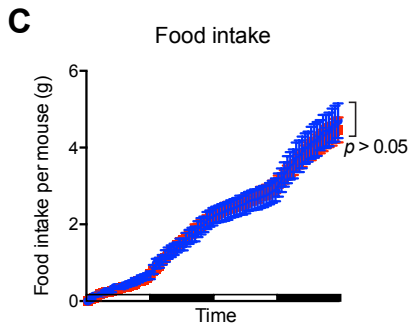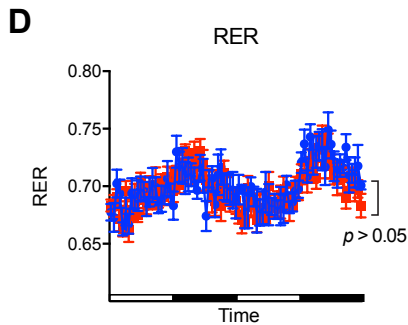

Figure S2

Supplement: NIHMS790543-supplement-2.pdf [file NIHMS790543-supplement-2.pdf]

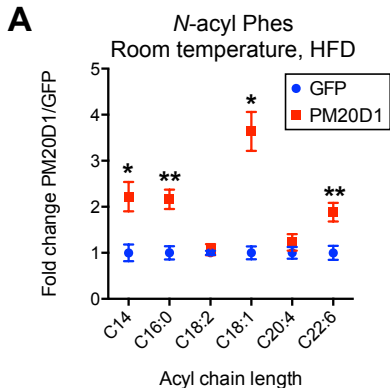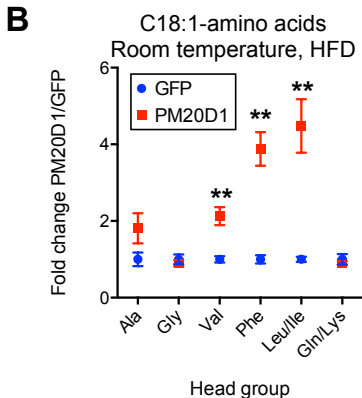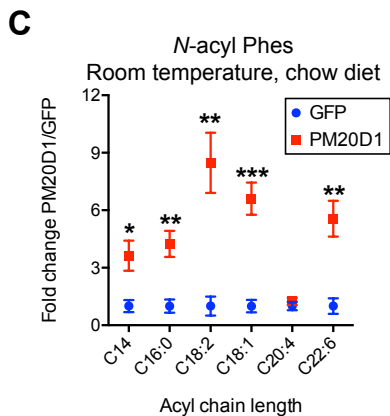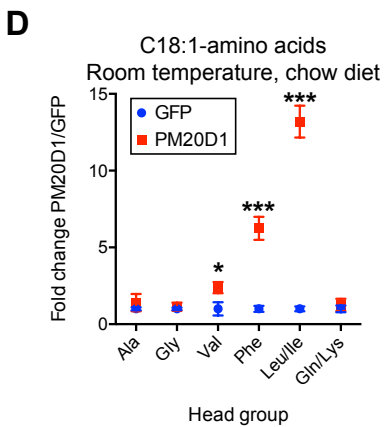

Figure S3

Supplement: NIHMS790543-supplement-3.pdf [file NIHMS790543-supplement-3.pdf]

**A**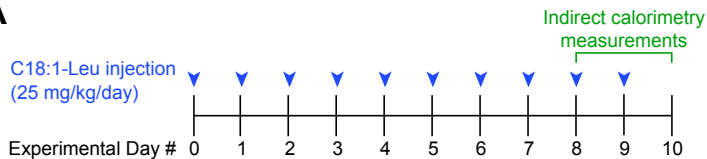**B**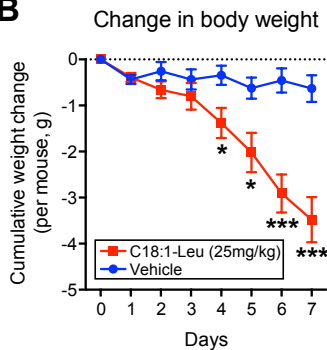**C**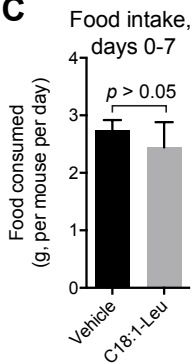**D**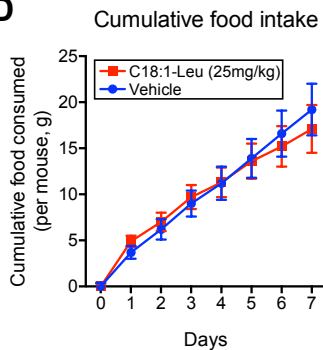**E**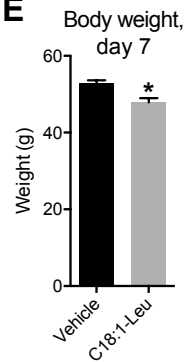**F**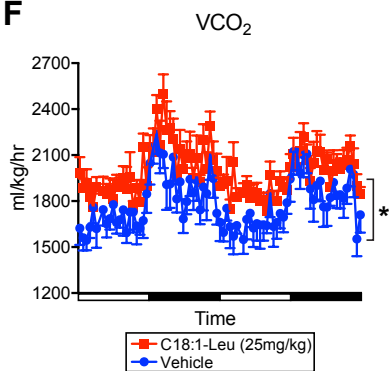**G**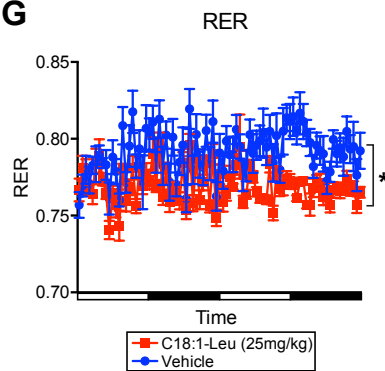**H**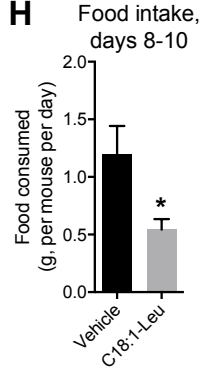

Figure S5

Supplement: NIHMS790543-supplement-5.pdf [file NIHMS790543-supplement-5.pdf]

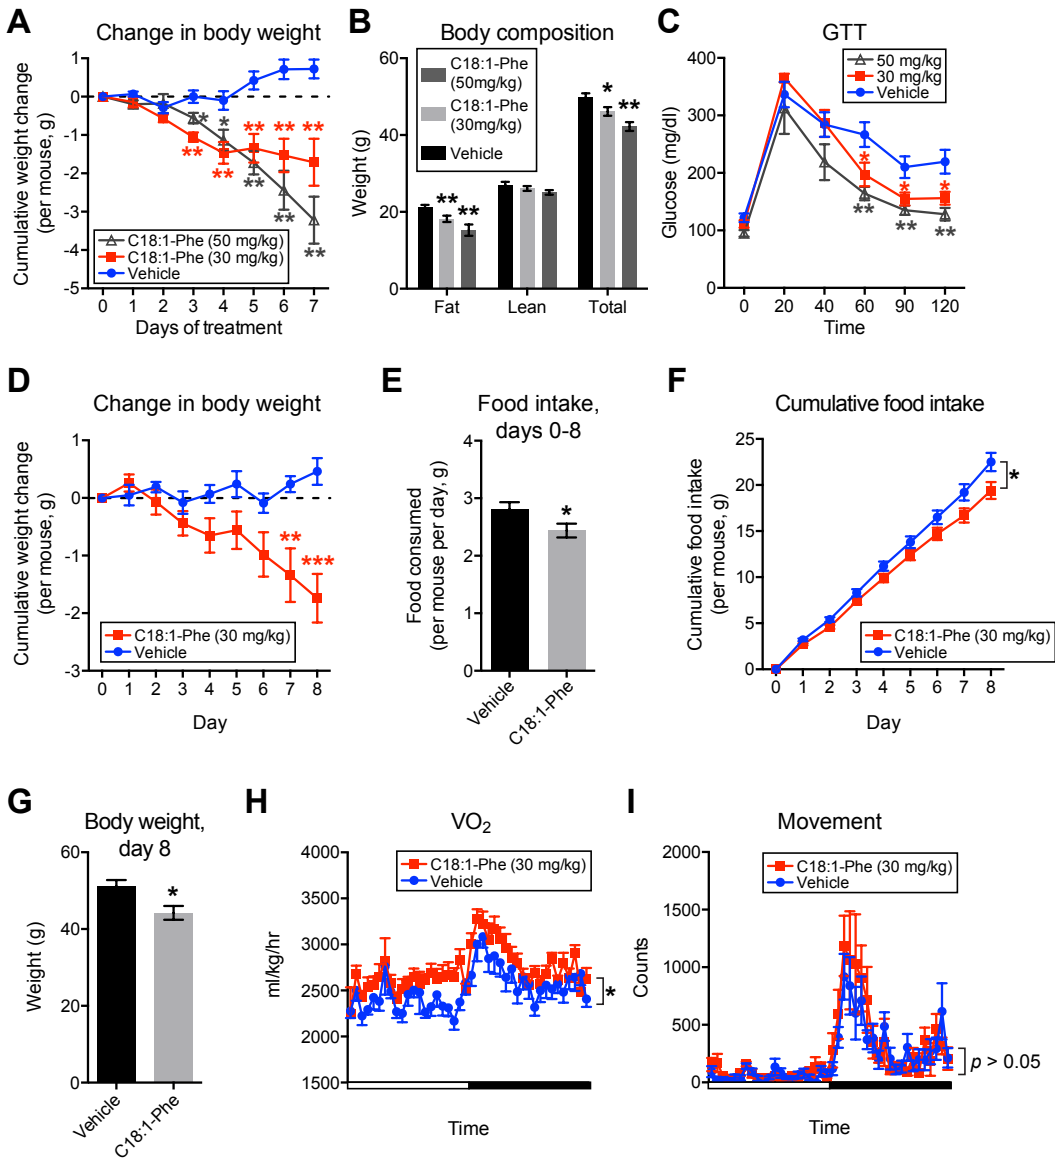

Figure S6

Supplement: NIHMS790543-supplement-6.pdf [file NIHMS790543-supplement-6.pdf]

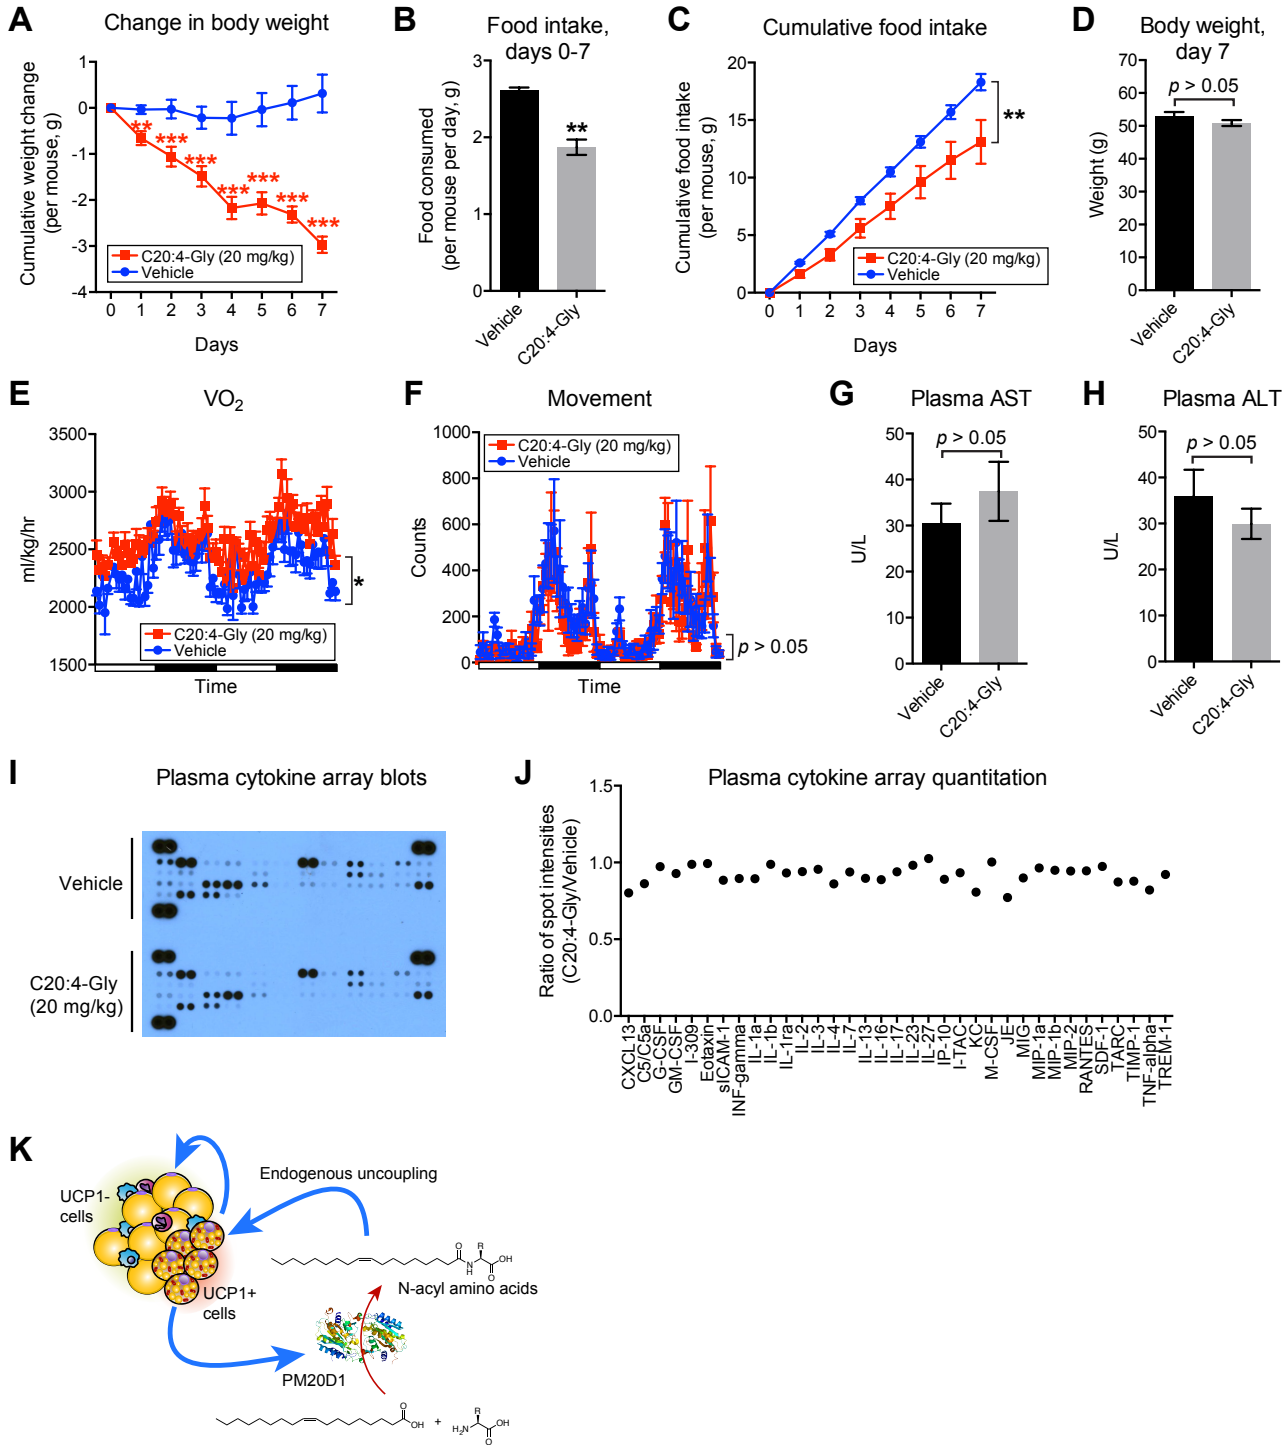

Figure S7

Supplement: NIHMS790543-supplement-7.pdf [file NIHMS790543-supplement-7.pdf]
